# Supplementary material for: On the accuracy of orbital based multi-level approaches for closed-shell transition metal chemistry
Source: Royal Society of Chemistry journal article supplement (doi:10.1039/d2cp05056k), 2023-01-01
Supplement: d2cp05056k1.pdf [file d2cp05056k1.pdf]

Cite this: DOI: 00.0000/xxxxxxxxxx

## On the accuracy of orbital based multi-level approaches for closed-shell transition metal chemistry

Zohreh Amanollahi,<sup>a‡</sup> Lukas Lampe,<sup>b‡</sup> Moritz Bensberg,<sup>c</sup> Johannes Neugebauer,<sup>b</sup> and Milica Feldt<sup>\*a</sup>

Table S1 Comparison of different local coupled cluster methods and different optimization schemes/thresholds for pair criteria in the case of LCCSD(T<sub>0</sub>) for the reaction 36 in MOR41 set.

| Local Coupled Cluster       |              | $\Delta E$ [kcal/mol] |
|-----------------------------|--------------|-----------------------|
| LCCSD(T <sub>0</sub> )      | rclose,rweak |                       |
|                             | 3,5          | -20.48                |
| IBBA                        | 4,6          | -19.90                |
|                             | 5,7          | -21.55                |
| Pipek-Mezey                 | 3,5          | -43.03                |
| PNO-CCSD(T)-F12             |              | -39.22                |
| DLPNO-CCSD(T <sub>0</sub> ) |              | -40.52                |

### Notes and references

- 1 M. A. Iron and T. Janes, *J. Phys. Chem. A*, 2019, **123**, 6379–6380.
- 2 M. A. Iron and T. Janes, *J. Phys. Chem. A*, 2019, **123**, 3761–3781.
- 3 S. Dohm, A. Hansen, M. Steinmetz, S. Grimme and M. P. Checinski, *J. Chem. Theory Comput.*, 2018, **14**, 2596–2608.
- 4 T. Weymuth, E. P. A. Couzijn, P. Chen and M. Reiher, *J. Chem. Theory Comput.*, 2014, **10**, 3092–3103.

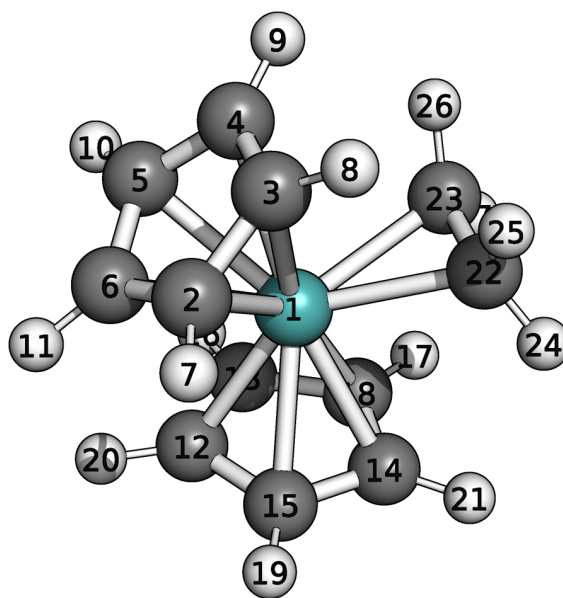

Fig. S1 Enumeration of the atoms in the reactant complex of reaction 36 from the MOR41 set.

<sup>a</sup> Leibniz Institute for Catalysis (LIKAT), Albert-Einstein-Str. 29A, 18059 Rostock, Germany. E-mail: milica.feldt@catalysis.de

<sup>b</sup> Theoretische Organische Chemie, Organisch-Chemisches Institut and Center for Multiscale Theory and Computation, Westfälische Wilhelms-Universität Münster, Corrensstraße 36, 48149 Münster, Germany.

<sup>c</sup> ETH Zürich, Laboratorium für Physikalische Chemie, Vladimir-Prelog-Weg 2, 8093 Zürich, Switzerland.

‡ These authors contributed equally to this work.

Table S2 Comparison of orbital domains of one of the aromatic systems obtained after IBO and Pipek-Mezey localization for reactant complex of reaction 36 from the MOR41 set. See Figure S1 for the enumeration of the atoms.

| IBO localization |      |        |       | Pipek-Mezey localization |      |        |       |
|------------------|------|--------|-------|--------------------------|------|--------|-------|
| Orb.             | Atom | Charge | Total | Orb.                     | Atom | Charge | Total |
| 36.1             | 5C   | 0.98   | 1.95  | 57.1                     | 5C   | 0.98   | 1.96  |
|                  | 4C   | 0.98   |       | 4C                       | 0.98 |        |       |
| 38.1             | 2C   | 0.98   | 1.98  | 48.1                     | 3C   | 0.98   | 1.96  |
|                  | 3C   | 0.98   |       |                          | 2C   | 0.98   |       |
|                  | 1Mo  | 0.03   |       |                          |      |        |       |
| 42.1             | 6C   | 0.98   | 1.96  | 55.1                     | 6C   | 0.98   | 1.96  |
|                  | 5C   | 0.97   |       |                          | 5C   | 0.97   |       |
| 43.1             | 6C   | 0.98   | 1.96  | 49.1                     | 6C   | 0.98   | 1.96  |
|                  | 2C   | 0.97   |       |                          | 2C   | 0.97   |       |
| 44.1             | 4C   | 0.99   | 1.97  | 51.1                     | 3C   | 0.98   | 1.98  |
|                  | 3C   | 0.99   |       |                          | 4C   | 0.98   |       |
|                  |      |        |       |                          | 1Mo  | 0.03   |       |
| 63.1             | 5C   | 1.03   | 1.96  | 54.1                     | 4C   | 0.84   | 1.96  |
|                  | 6C   | 0.39   |       |                          | 5C   | 0.75   |       |
|                  | 4C   | 0.28   |       |                          | 1Mo  | 0.25   |       |
|                  | 1Mo  | 0.26   |       |                          | 2C   | 0.07   |       |
| 64.1             |      |        | 1.95  | 50.1                     | 3C   | 0.05   | 1.94  |
|                  | 2C   | 1.03   |       |                          | 6C   | 1.02   |       |
|                  | 6C   | 0.42   |       |                          | 1Mo  | 0.36   |       |
|                  | 1Mo  | 0.26   |       |                          | 2C   | 0.30   |       |
|                  | 3C   | 0.25   |       |                          | 5C   | 0.22   |       |
| 68.1             |      |        | 1.95  | 46.1                     | 4C   | 0.04   | 1.96  |
|                  | 3C   | 0.70   |       |                          | 3C   | 0.91   |       |
|                  | 4C   | 0.66   |       |                          | 2C   | 0.64   |       |
|                  | 1Mo  | 0.42   |       |                          | 1Mo  | 0.26   |       |
|                  | 6C   | 0.17   |       |                          | 4C   | 0.09   |       |
|                  |      |        |       | 5C                       | 0.06 |        |       |

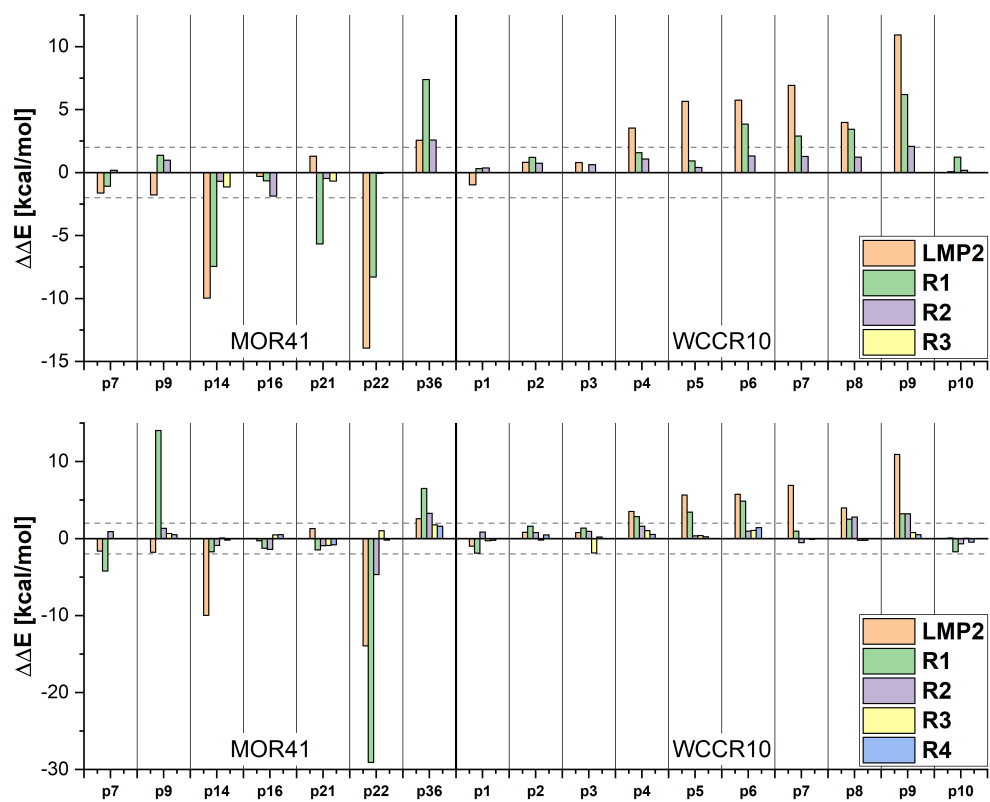

Fig. S2 Errors in the relative energies  $\Delta\Delta E$  of LMP2 and LCCSD(T0):LMP2 calculations with three different manual region selections (upper panel) and four DOS region selections (lower panel) compared to LCCSD(T0) on the examples of the MOR41 and WCCR10 test sets.

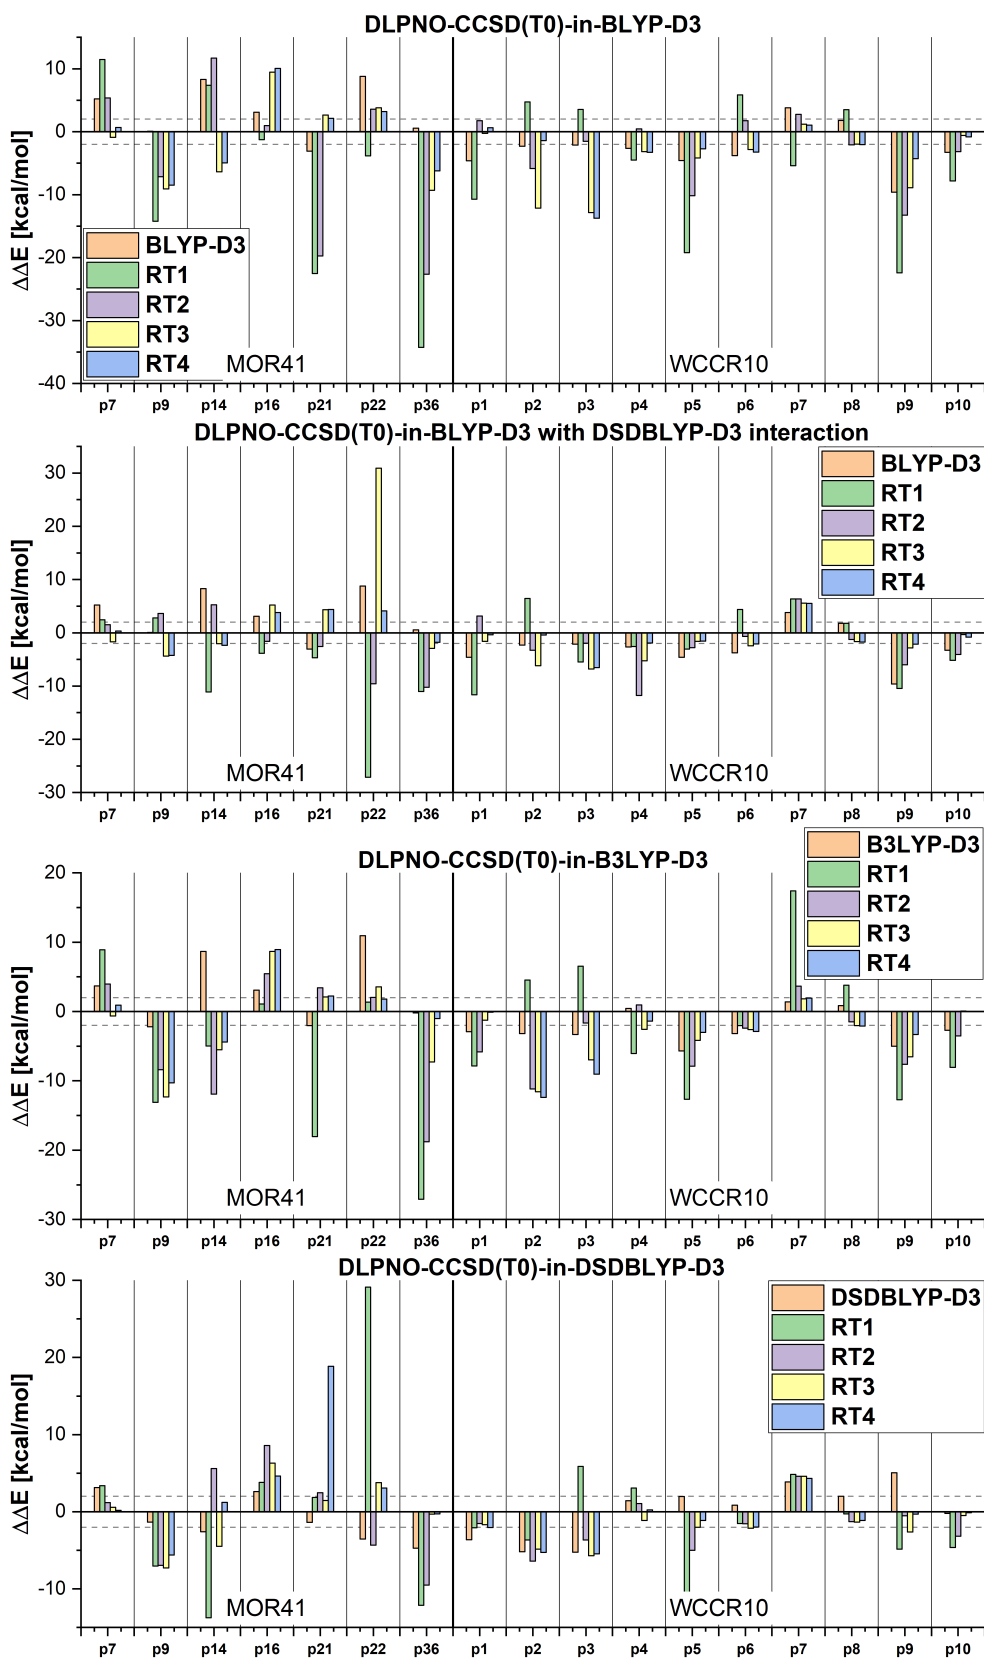

Fig. S3 Errors in the relative energies  $\Delta\Delta E$  of different DFT functionals and DLPNO-CCSD( $T_0$ )-in-DFT calculations with four different region selections compared to DLPNO-CCSD( $T_0$ ) for the MOR41 and WCCR10 test sets.

Table S3 Orbitals included in high level region in R3 but not in RT2 and vice versa for reaction 24 in MOBH35.

| Reactant orbitals |              |       |                           |
|-------------------|--------------|-------|---------------------------|
| R3                |              | RT2   |                           |
| Orb.              | Atoms        | Orb.  | Atoms                     |
| 51.1              | 73 O - 71 C  | 66.1  | 3 C - 1 C                 |
| 52.1              | 18 O - 17 C  | 69.1  | 4 C - 2 C                 |
| 56.1              | 6 N - 1 C    | 78.1  | 77 C - 80 H               |
| 72.1              | 17 C - 74 RE | 92.1  | 12 C - 14 H               |
| 107.1             | 12 C - 16 P  | 93.1  | 12 C - 13 H               |
| 124.1             | 46 C - 16 P  | 97.1  | 3 C - 8 H                 |
| 134.1             | 59 C - 16 P  | 108.1 | 47 C 51 H                 |
| 138.1             | 33 C - 15 P  | 122.1 | 22 C - 29 H               |
| 139.1             | 16 P - 74 RE | 151.1 | 79 C - 77 C - 83 C - 78 C |

  

| Transition state orbitals |              |       |                           |
|---------------------------|--------------|-------|---------------------------|
| R3                        |              | RT2   |                           |
| Orb.                      | Atoms        | Orb.  | Atoms                     |
| 51.1                      | 18 O - 17 C  | 65.1  | 4 C - 3 C                 |
| 52.1                      | 73 O - 72 C  | 66.1  | 2 C - 1 C                 |
| 56.1                      | 6 N - 1 C    | 67.1  | 2 C - 3 C                 |
| 72.1                      | 17 C - 74 RE | 87.1  | 77 C - 80 H               |
| 97.1                      | 49 C - 58 H  | 91.1  | 3 C - 7 H                 |
| 107.1                     | 12 C - 16 P  | 92.1  | 12 C - 14 H               |
| 131.1                     | 59 C - 16 P  | 93.1  | 12 C - 13 H               |
| 136.1                     | 46 C - 16 P  | 115.1 | 22 C - 29 H               |
| 139.1                     | 33 C - 15 P  | 117.1 | 47 C - 51 H               |
| 140.1                     | 16 P - 74 RE | 151.1 | 79 C - 77 C - 83 C - 78 C |

  

| Product orbitals |              |       |                           |
|------------------|--------------|-------|---------------------------|
| R3               |              | RT2   |                           |
| Orb.             | Atoms        | Orb.  | Atoms                     |
| 51.1             | 18 O - 17 C  | 58.1  | 2 C - 1 C                 |
| 52.1             | 73 O - 72 C  | 60.   | 4 C - 3 C                 |
| 55.1             | 6 N - 1 C    | 84.1  | 3 C - 7 H                 |
| 71.1             | 17 C - 74 RE | 88.1  | 2 C - 8 H                 |
| 87.1             | 4 C - 9 H    | 90.1  | 12 C - 14 H               |
| 122.1            | 12 C - 16 P  | 91.1  | 12 C - 13 H               |
| 130.1            | 59 C - 16 P  | 92.1  | 77 C - 80 H               |
| 132.1            | 33 C - 15 P  | 135.1 | 22 C - 29 H               |
| 137.1            | 46 C - 16 P  | 138.1 | 47 C - 51 H               |
| 140.1            | 16 P - 74 RE | 153.1 | 79 C - 83 C - 77 C - 78 C |

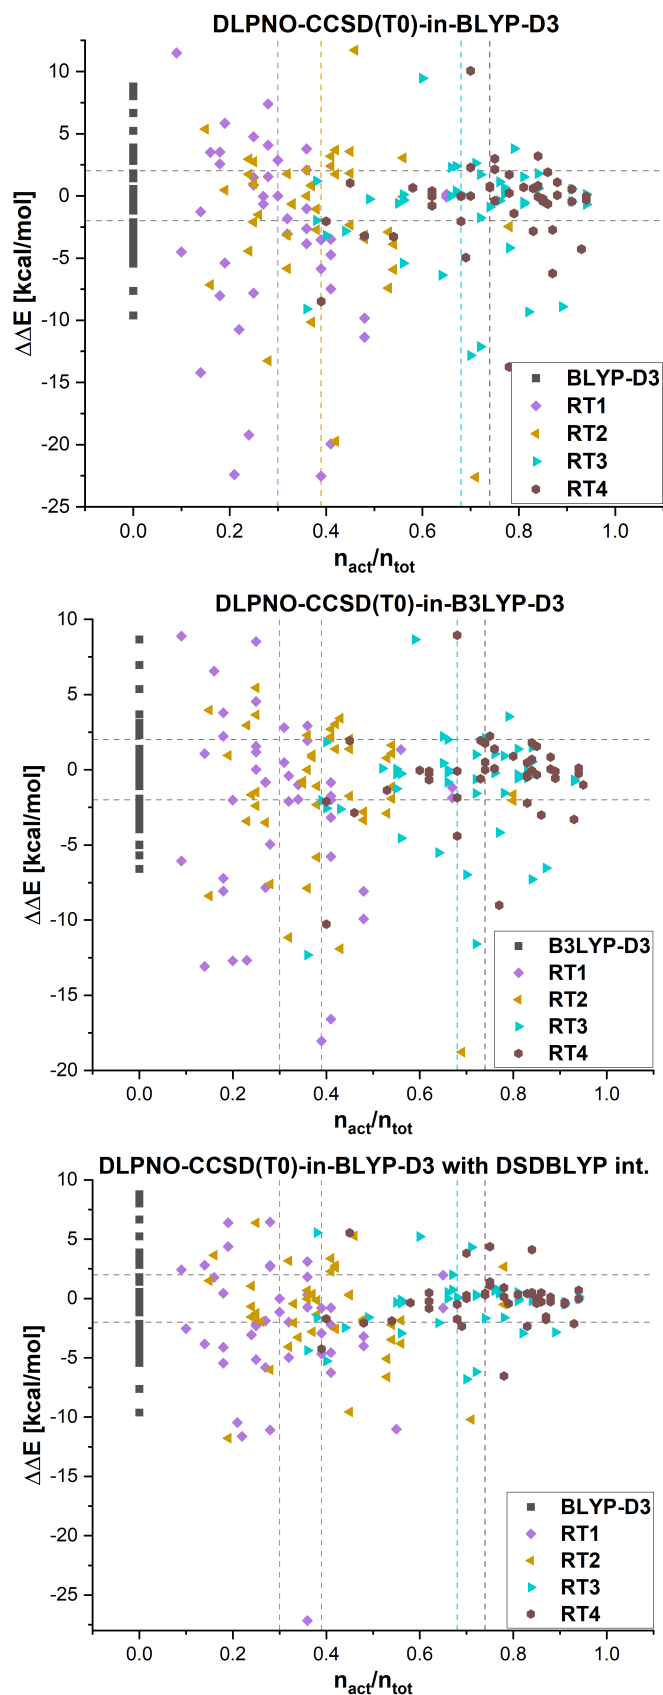

Fig. S4 Errors in the relative energies  $\Delta\Delta E$  plotted against the ratio of valence orbitals correlated in the active region  $n_{act}/n_{tot}$  in the DLPNO-CCSD(T<sub>0</sub>)-in-DFT schemes for all systems. Vertical lines represent the average ratio of correlated orbitals for the corresponding region selection.

Table S4 Summary of DFT, LMP2 and local coupled cluster results for MOBH35 systems. Absolute errors (AE) (mean AE, max AE and min AE) and standard deviation (SD) are calculated based on DLPNO-CCSD( $T_0$ ) reference energy in the case of DFT and based on LCCSD( $T_0$ ) in the case of LMP2.

| MOBH35  | BLYP  | B3LYP | DSDBLYP | LMP2  | LCCSD( $T_0$ ) | DLPNO-CCSD( $T_0$ ) | DLPNO-CCSD( $T$ ) <sup>a</sup> |
|---------|-------|-------|---------|-------|----------------|---------------------|--------------------------------|
| ts1     | 22.8  | 25.5  | 26.1    | 25.1  | 28.4           | 27.5                | 26.0                           |
| p1      | 8.3   | 8.9   | 11.8    | 14.4  | 12.0           | 12.6                | 10.6                           |
| ts6     | 13.2  | 15.0  | 15.5    | 16.6  | 17.5           | 16.1                | 15.8                           |
| p6      | -0.4  | 1.6   | 1.0     | 6.0   | 5.4            | 0.5                 | 1.5                            |
| ts7     | 21.1  | 24.7  | 25.1    | 20.5  | 25.1           | 28.7                | 27.9                           |
| p7      | 7.9   | 8.6   | 7.6     | 7.0   | 7.1            | 10.5                | 9.5                            |
| ts11    | 30.8  | 36.1  | 35.9    | 36.8  | 34.9           | 36.3                | 34.8                           |
| p11     | -58.0 | -57.8 | -53.8   | -50.2 | -57.2          | -55.5               | -54.8                          |
| ts14    | 7.2   | 9.2   | 9.7     | 10.9  | 11.6           | 10.2                | 10.3                           |
| p14     | -5.6  | -4.4  | -4.6    | -2.1  | -2.1           | -4.4                | -4.1                           |
| ts21    | 11.1  | 11.4  | 8.6     | 5.6   | 7.5            | 8.3                 | 9.2                            |
| p21     | 0.0   | 0.0   | 0.0     | 0.0   | 0.0            | 0.0                 | 0.0                            |
| ts22    | 12.9  | 14.9  | 13.9    | 13.1  | 18.5           | 15.6                | 14.3                           |
| p22     | -8.4  | -11.2 | -11.8   | -10.9 | -10.7          | -12.3               | -14.8                          |
| ts24    | 2.9   | 3.9   | 2.4     | 3.3   | 3.9            | 2.8                 | 2.9                            |
| p24     | -5.7  | -8.4  | -11.8   | -10.5 | -10.9          | -13.8               | -14.1                          |
| ts29    | 10.3  | 12.3  | 13.8    | 15.6  | 16.9           | 14.7                | 15.0                           |
| p29     | -12.6 | -13.9 | -15.6   | -16.1 | -15.8          | -16.2               | -15.9                          |
| ts30    | 11.8  | 11.3  | 11.3    | 10.6  | 12.3           | 11.4                | 9.9                            |
| p30     | -6.2  | -8.2  | -6.6    | -4.6  | -6.5           | -6.0                | -7.3                           |
| ts31    | 4.7   | 5.9   | 3.4     | 0.0   | 3.2            | 3.2                 | 3.3                            |
| p31     | -5.4  | -5.1  | -9.5    | -12.6 | -10.6          | -12.1               | -10.1                          |
| ts34    | 27.7  | 27.7  | 31.4    | 33.9  | 31.2           | 32.7                | 29.2                           |
| p34     | 24.2  | 22.8  | 28.8    | 35.2  | 29.2           | 29.4                | 26.2                           |
| ts35    | 12.4  | 14.6  | 16.2    | 18.7  | 16.3           | 17.2                | 18.3                           |
| p35     | 16.1  | 18.0  | 18.0    | 18.0  | 15.2           | 18.5                | 19.7                           |
| mean AE | 3.3   | 2.3   | 1.0     | 2.1   |                |                     |                                |
| SD      | 3.9   | 3.0   | 1.3     | 2.9   |                |                     |                                |
| max AE  | 8.0   | 7.0   | 3.6     | 6.9   |                |                     |                                |
| min AE  | 0.0   | 0.0   | 0.0     | 0.0   |                |                     |                                |

<sup>a</sup> DLPNO-CCSD(T)/CBSW1+ $\Delta$ (T)/TZVP taken from Ref. 1. For detailed description of the approach they used see Ref. 2

Table S5 Summary of DFT, LMP2 and local coupled cluster results for MOR41 systems. Absolute errors (AE) (mean AE, max AE and min AE) and standard deviation (SD) are calculated based on DLPNO-CCSD( $T_0$ ) reference energy in the case of DFT and based on LCCSD( $T_0$ ) in the case of LMP2.

| MOR41   | BLYP  | B3LYP | DSDBLYP | LMP2  | LCCSD( $T_0$ ) | DLPNO-CCSD( $T_0$ ) | DLPNO-CCSD( $T$ ) <sup>a</sup> |
|---------|-------|-------|---------|-------|----------------|---------------------|--------------------------------|
| p7      | -9.2  | -10.8 | -11.3   | -12.7 | -11.0          | -14.5               | -16.2                          |
| p9      | -9.8  | -12.0 | -11.2   | -16.3 | -14.5          | -9.8                | -18.7                          |
| p14     | -43.8 | -43.4 | -54.6   | -54.5 | -44.5          | -52.1               | -52.0                          |
| p16     | -39.6 | -39.6 | -40.0   | -30.2 | -29.9          | -42.7               | -39.8                          |
| p21     | -18.0 | -17.0 | -16.3   | -15.1 | -16.3          | -14.9               | -15.1                          |
| p22     | -33.7 | -31.5 | -46.0   | -36.0 | -22.1          | -42.5               | -35.9                          |
| p36     | -40.0 | -40.7 | -45.2   | -17.9 | -20.5          | -40.5               | -39.8                          |
| mean AE | 4.2   | 4.4   | 2.8     | 4.5   |                |                     |                                |
| SD      | 4.4   | 5.1   | 3.0     | 6.2   |                |                     |                                |
| max AE  | 8.8   | 10.9  | 4.7     | 13.9  |                |                     |                                |
| min AE  | 0.1   | 0.2   | 1.3     | 0.3   |                |                     |                                |

<sup>a</sup> DLPNO-CCSD(T)/TightPNO/CBS(def2-TZVPP/def2-QZVPP) taken from Ref. 3

Table S6 Summary of DFT, LMP2 and local coupled cluster results for WCCR10 systems. Absolute errors (AE) (mean AE, max AE and min AE) and standard deviation (SD) are calculated based on DLPNO-CCSD(T<sub>0</sub>) reference energy in the case of DFT and based on LCCSD(T<sub>0</sub>) in the case of LMP2.

| <b>WCCR10</b> | <b>BLYP</b> | <b>B3LYP</b> | <b>DSDBLYP</b> | <b>LMP2</b> | <b>LCCSD(T<sub>0</sub>)</b> | <b>DLPNO-CCSD(T<sub>0</sub>)</b> | <b>DLPNO-CCSD(T)<sup>a</sup></b> |
|---------------|-------------|--------------|----------------|-------------|-----------------------------|----------------------------------|----------------------------------|
| p1            | 25.5        | 27.2         | 26.4           | 23.5        | 24.5                        | 30.1                             | 25.6                             |
| p2            | 69.4        | 68.5         | 66.5           | 55.2        | 54.4                        | 71.7                             | 63.4                             |
| p3            | 69.9        | 68.7         | 66.8           | 56.3        | 55.5                        | 72.0                             | 63.0                             |
| p4            | 50.8        | 53.9         | 54.9           | 51.1        | 47.6                        | 53.4                             | 52.7                             |
| p5            | 48.6        | 47.5         | 55.2           | 48.4        | 42.7                        | 53.2                             | 45.1                             |
| p6            | 63.8        | 64.4         | 68.4           | 72.2        | 66.5                        | 67.5                             | 67.4                             |
| p7            | 62.9        | 60.4         | 62.9           | 63.7        | 56.8                        | 59.1                             | 59.7                             |
| p8            | 50.9        | 49.9         | 51.1           | 52.6        | 48.7                        | 49.1                             | 50.1                             |
| p9            | 32.5        | 37.1         | 47.2           | 45.4        | 34.5                        | 42.1                             | 35.9                             |
| p10           | 21.8        | 22.3         | 24.8           | 25.5        | 25.5                        | 25.0                             | 23.7                             |
| mean AE       | 3.9         | 2.9          | 2.9            | 3.9         |                             |                                  |                                  |
| SD            | 3.6         | 2.4          | 3.6            | 3.7         |                             |                                  |                                  |
| max AE        | 9.6         | 5.7          | 5.2            | 10.9        |                             |                                  |                                  |
| min AE        | 1.8         | 0.4          | 0.2            | 0.1         |                             |                                  |                                  |

<sup>a</sup> DLPNO-CCSD(T)/CBS taken from Ref. 4

Table S7 Reaction barriers (*tsn*) and reaction energies (*pn*) of all the systems computed at LCCSD(T0):LMP2/def2-TZVP with three different manual (R1-R3) and four different DOS (RT1-RT4) region selections and full LCCSD(T0)/def2-TZVP. Absolute errors (AE) (mean AE, max AE and min AE) and standard deviation (SD) are calculated based on LCCSD(T0).

| <b>MOBH35</b> | R1             | R2    | R3    | RT1   | RT2   | RT3   | RT4   | LCCSD(T0) |
|---------------|----------------|-------|-------|-------|-------|-------|-------|-----------|
| ts1           | 25.3           | 28.2  |       | 26.1  | 27.1  | 28.1  | 28.3  | 28.4      |
| p1            | 14.6           | 14.1  |       | 13.4  | 13.3  | 12.6  | 12.4  | 12.0      |
| ts6           | 17.5           | 18.3  | 17.1  | 18.0  | 18.0  | 17.7  | 17.8  | 17.5      |
| p6            | 8.4            | 7.0   | 4.8   | 4.9   | 5.5   | 5.5   | 5.6   | 5.4       |
| ts7           | 19.6           | 24.0  | 23.8  | 22.9  | 24.1  | 25.3  | 25.4  | 25.1      |
| p7            | 6.6            | 8.0   | 7.7   | 7.6   | 7.8   | 7.2   | 7.2   | 7.1       |
| ts11          | 42.2           | 38.2  | 35.2  | 38.5  | 37.1  | 35.3  | 35.4  | 34.9      |
| p11           | -50.3          | -56.4 | -56.5 | -52.4 | -55.6 | -56.8 | -56.8 | -57.2     |
| ts14          | 9.1            | 12.3  | 11.6  | 12.0  | 11.9  | 11.7  | 11.8  | 11.6      |
| p14           | -3.3           | -0.4  | -2.3  | -2.6  | -2.6  | -2.0  | -1.9  | -2.1      |
| ts21          | 6.5            | 7.3   |       | 6.4   | 6.1   | 7.5   | 7.4   | 7.5       |
| p21           | 0.0            | 0.0   |       | 0.0   | 0.0   | 0.0   | 0.0   | 0.0       |
| ts22          | 14.8           | 14.3  | 18.0  | 17.7  | 17.8  | 18.3  | 18.4  | 18.5      |
| p22           | -7.8           | -13.5 | -10.8 | -10.4 | -10.4 | -10.7 | -10.6 | -10.7     |
| ts24          | 2.7            | 2.7   | 4.2   | -8.3  | -12.4 | -14.1 | 3.6   | 3.9       |
| p24           | -10.2          | -12.9 | -10.9 | -36.8 | -28.2 | -29.2 | -11.0 | -10.9     |
| ts29          | 15.4           | 15.5  | 16.8  | 16.8  | 16.7  | 17.1  | 17.1  | 16.9      |
| p29           | -14.0          | -13.4 | -16.0 | -18.6 | -18.7 | -16.0 | -15.8 | -15.8     |
| ts30          | 12.5           | 12.5  |       | 12.6  | 12.6  | 12.5  | 12.5  | 12.3      |
| p30           | -4.7           | -6.3  |       | -6.8  | -6.8  | -6.3  | -6.3  | -6.5      |
| ts31          | 2.8            | 3.4   |       | 2.9   | 3.1   | 2.8   | 3.4   | 3.2       |
| p31           | -12.3          | -11.0 |       | -12.1 | -11.0 | -10.4 | -10.4 | -10.6     |
| ts34          | 33.0           | 31.1  |       | 31.1  | 31.5  | 31.2  | 31.1  | 31.2      |
| p34           | 33.0           | 28.8  |       | 29.0  | 29.5  | 29.1  | 29.0  | 29.2      |
| ts35          | 15.6           | 16.2  |       | 16.3  | 15.7  | 16.3  | 16.4  | 16.3      |
| p35           | 15.1           | 15.1  |       | 15.2  | 14.3  | 15.3  | 15.4  | 15.2      |
| mean AE       | 2.1            | 1.1   | 0.4   | 2.4   | 2.0   | 1.6   | 0.2   |           |
| SD            | 2.9            | 1.6   | 0.5   | 5.7   | 4.6   | 4.9   | 0.2   |           |
| max AE        | 7.3            | 4.2   | 1.3   | 25.9  | 17.3  | 18.2  | 0.5   |           |
| min AE        | 0.0            | 0.0   | 0.0   | 0.0   | 0.0   | 0.0   | 0.0   |           |
| <b>MOR41</b>  | R1             | R2    | R3    | RT1   | RT2   | RT3   | RT4   | LCCSD(T0) |
| p7            | -12.1          | -10.9 |       | -15.3 | -10.1 | -11.1 | -11.1 | -11.0     |
| p9            | -13.2          | -13.5 |       | -0.5  | -13.2 | -13.9 | -14.0 | -14.5     |
| p14           | -52.0          | -45.2 | -45.6 | -46.2 | -45.4 | -44.4 | -44.7 | -44.5     |
| p16           | -30.6          | -31.8 |       | -31.2 | -31.4 | -29.5 | -29.4 | -29.9     |
| p21           | -22.0          | -16.8 | -17.0 | -17.8 | -17.3 | -17.2 | -17.2 | -16.3     |
| p22           | -30.4          | -22.1 |       | -51.2 | -26.8 | -21.1 | -22.3 | -22.1     |
| p36           | -13.1          | -17.9 | -20.5 | -14.0 | -17.2 | -18.7 | -18.9 | -20.5     |
| mean AE       | 4.6            | 1.0   | 0.6   | 8.3   | 1.9   | 0.7   | 0.5   |           |
| SD            | 5.6            | 1.4   | 0.6   | 13.3  | 2.5   | 0.9   | 0.8   |           |
| max AE        | 8.3            | 2.6   | 1.1   | 29.1  | 4.7   | 1.8   | 1.6   |           |
| min AE        | 0.7            | 0.1   | 0.0   | 1.3   | 0.9   | 0.0   | 0.0   |           |
| <b>MOR41</b>  | R1             | R2    | R3    | RT1   | RT2   | RT3   | RT4   | LCCSD(T0) |
| p1            | 24.8           | 24.9  |       | 22.6  | 25.4  | 24.2  | 24.3  | 24.5      |
| p2            | 55.6           | 55.2  |       | 56.0  | 55.2  | 54.2  | 54.9  | 54.4      |
| p3            | - <sup>a</sup> | 56.2  |       | 56.9  | 56.5  | 53.7  | 55.7  | 55.5      |
| p4            | 49.1           | 48.6  |       | 50.4  | 49.2  | 48.6  | 48.1  | 47.6      |
| p5            | 43.7           | 43.2  |       | 46.2  | 43.1  | 43.1  | 43.0  | 42.7      |
| p6            | 70.4           | 67.8  |       | 71.4  | 67.5  | 67.6  | 67.9  | 66.5      |
| p7            | 59.7           | 58.0  |       | 57.7  | 56.2  | 56.8  | 56.7  | 56.8      |
| p8            | 52.1           | 49.9  |       | 51.2  | 51.5  | 48.4  | 48.4  | 48.7      |
| p9            | 40.7           | 36.6  |       | 37.7  | 37.7  | 35.3  | 35.0  | 34.5      |
| p10           | 26.7           | 25.6  |       | 23.7  | 24.8  | 25.5  | 25.0  | 25.5      |
| mean AE       | 2.4            | 0.9   |       | 2.4   | 1.3   | 0.6   | 0.4   |           |
| SD            | 1.9            | 0.6   |       | 2.2   | 1.3   | 0.8   | 0.5   |           |
| max AE        | 6.2            | 2.1   |       | 4.9   | 3.2   | 1.9   | 1.4   |           |
| min AE        | 0.0            | 0.2   |       | 1.0   | 0.3   | 0.0   | 0.1   |           |

<sup>a</sup> The calculation stopped without giving any kind of error message.



Table S8 Reaction barriers ( $ts_n$ ) and reaction energies ( $pn$ ) of all the systems computed at DLPNO-CCSD( $T_0$ )-in-BLYP-D3 for four different DOS (RT1-RT4) region selections and full DLPNO-CCSD( $T_0$ )/def2-TZVP. Absolute errors (AE) (mean AE, max AE and min AE) and standard deviation (SD) are calculated based on DLPNO-CCSD( $T_0$ ).

| <b>MOBH35</b> | RT1   | RT2   | RT3   | RT4   | DLPNO-CCSD( $T_0$ ) |
|---------------|-------|-------|-------|-------|---------------------|
| ts1           | 30.1  | 30.5  | 27.2  | 27.5  | 27.5                |
| p1            | 4.6   | 8.2   | 7.2   | 10.6  | 12.6                |
| ts6           | 11.4  | 16.0  | 15.6  | 15.6  | 16.1                |
| p6            | -3.0  | 3.5   | 1.0   | 1.0   | 0.5                 |
| ts7           | 28.8  | 26.2  | 28.0  | 28.4  | 28.7                |
| p7            | 10.4  | 8.0   | 10.6  | 10.5  | 10.5                |
| ts11          | 28.8  | 33.4  | 35.7  | 35.6  | 36.3                |
| p11           | -75.4 | -62.9 | -53.9 | -53.5 | -55.5               |
| ts14          | 0.4   | 6.4   | 10.8  | 10.3  | 10.2                |
| p14           | -15.8 | -10.4 | -2.6  | -3.3  | -4.4                |
| ts21          | 11.2  | 10.4  | 10.6  | 10.6  | 8.3                 |
| p21           | 0.0   | 0.0   | 0.0   | 0.0   | 0.0                 |
| ts22          | 17.7  | 18.0  | 16.8  | 16.4  | 15.6                |
| p22           | -8.5  | -9.1  | -12.7 | -12.4 | -12.3               |
| ts24          | 4.4   | 3.6   | 2.9   | 3.4   | 2.8                 |
| p24           | -9.7  | -12.9 | -13.1 | -16.6 | -13.8               |
| ts29          | 11.2  | 11.5  | 12.9  | 14.3  | 14.7                |
| p29           | -22.1 | -19.6 | -14.5 | -13.2 | -16.2               |
| ts30          | 10.7  | 10.7  | 11.0  | 11.4  | 11.4                |
| p30           | -6.0  | -6.6  | -5.9  | -5.6  | -6.0                |
| ts31          | 4.7   | 6.9   | 3.6   | 3.5   | 3.2                 |
| p31           | -11.2 | -10.3 | -9.7  | -10.4 | -12.1               |
| ts34          | 31.7  | 31.6  | 32.8  | 33.4  | 32.7                |
| p34           | 26.8  | 26.7  | 29.5  | 30.2  | 29.4                |
| ts35          | 14.1  | 14.8  | 16.7  | 16.9  | 17.2                |
| p35           | 16.7  | 20.3  | 17.9  | 18.0  | 18.5                |
| mean AE       | 4.0   | 2.5   | 0.9   | 0.8   |                     |
| SD            | 5.5   | 3.0   | 1.5   | 1.2   |                     |
| max AE        | 19.9  | 7.4   | 5.4   | 3.0   |                     |
| min AE        | 0.0   | 0.0   | 0.0   | 0.0   |                     |
| <b>MOR41</b>  | RT1   | RT2   | RT3   | RT4   | DLPNO-CCSD( $T_0$ ) |
| p7            | -3.0  | -9.1  | -15.4 | -13.8 | -14.5               |
| p9            | -24.1 | -17.0 | -18.9 | -18.3 | -9.8                |
| p14           | -44.7 | -40.4 | -58.4 | -57.0 | -52.1               |
| p16           | -43.9 | -41.7 | -33.2 | -32.6 | -42.7               |
| p21           | -37.5 | -34.6 | -12.3 | -12.8 | -14.9               |
| p22           | -46.3 | -38.9 | -38.7 | -39.3 | -42.5               |
| p36           | -74.8 | -63.1 | -49.8 | -46.7 | -40.5               |
| mean AE       | 13.6  | 10.2  | 5.9   | 5.1   |                     |
| SD            | 16.4  | 13.0  | 7.2   | 6.5   |                     |
| max AE        | 34.3  | 22.6  | 9.4   | 10.1  |                     |
| min AE        | 1.3   | 1.0   | 0.9   | 0.7   |                     |
| <b>WCCR10</b> | RT1   | RT2   | RT3   | RT4   | DLPNO-CCSD( $T_0$ ) |
| p1            | 19.3  | 31.8  | 29.8  | 30.7  | 30.1                |
| p2            | 76.4  | 65.9  | 59.6  | 70.3  | 71.7                |
| p3            | 75.5  | 70.5  | 59.2  | 58.3  | 72.0                |
| p4            | 48.9  | 53.9  | 50.3  | 50.2  | 53.4                |
| p5            | 34.0  | 43.1  | 49.0  | 50.5  | 53.2                |
| p6            | 73.4  | 69.3  | 64.7  | 64.3  | 67.5                |
| p7            | 53.7  | 61.8  | 60.2  | 60.1  | 59.1                |
| p8            | 52.6  | 47.0  | 47.1  | 47.0  | 49.1                |
| p9            | 19.7  | 28.9  | 33.2  | 37.9  | 42.1                |
| p10           | 17.2  | 21.9  | 24.4  | 24.2  | 25.0                |
| mean AE       | 8.8   | 4.3   | 4.8   | 3.3   |                     |
| SD            | 10.0  | 5.3   | 5.0   | 4.2   |                     |
| max AE        | 22.4  | 13.3  | 12.8  | 13.7  |                     |
| min AE        | 3.5   | 0.5   | 0.3   | 0.6   |                     |

Table S9 Reaction barriers (*tsn*) and reaction energies (*pn*) of all the systems computed at DLPNO-CCSD( $T_0$ )-in-BLYP-D3 with DSDBLYP interaction for four different DOS (RT1-RT4) region selections and full DLPNO-CCSD( $T_0$ )/def2-TZVP. Absolute errors (AE) (mean AE, max AE and min AE) and standard deviation (SD) are calculated based on DLPNO-CCSD( $T_0$ ).

| <b>MOBH35</b> | RT1   | RT2   | RT3   | RT4   | DLPNO-CCSD( $T_0$ ) |
|---------------|-------|-------|-------|-------|---------------------|
| ts1           | 28.0  | 28.6  | 27.1  | 27.0  | 27.5                |
| p1            | 8.5   | 11.1  | 9.7   | 10.9  | 12.6                |
| ts6           | 15.3  | 14.2  | 15.6  | 15.6  | 16.1                |
| p6            | -1.8  | -3.3  | 0.1   | 0.1   | 0.5                 |
| ts7           | 27.9  | 28.2  | 28.7  | 28.7  | 28.7                |
| p7            | 12.5  | 13.2  | 10.7  | 11.2  | 10.5                |
| ts11          | 31.7  | 31.2  | 36.1  | 36.0  | 36.3                |
| p11           | -61.7 | -62.1 | -54.9 | -55.0 | -55.5               |
| ts14          | 7.0   | 8.0   | 10.0  | 10.0  | 10.2                |
| p14           | -8.5  | -7.9  | -4.1  | -4.3  | -4.4                |
| ts21          | 7.2   | 9.0   | 8.8   | 8.6   | 8.3                 |
| p21           | 0.0   | 0.0   | 0.0   | 0.0   | 0.0                 |
| ts22          | 17.5  | 17.9  | 16.5  | 16.1  | 15.6                |
| p22           | -9.2  | -8.9  | -11.6 | -11.9 | -12.3               |
| ts24          | 5.5   | 3.2   | 3.2   | 3.2   | 2.8                 |
| p24           | -11.0 | -13.5 | -13.1 | -16.1 | -13.8               |
| ts29          | 13.9  | 12.9  | 14.9  | 15.8  | 14.7                |
| p29           | -19.1 | -18.0 | -15.9 | -14.8 | -16.2               |
| ts30          | 9.5   | 10.9  | 11.2  | 11.9  | 11.4                |
| p30           | -11.8 | -8.0  | -6.3  | -6.2  | -6.0                |
| ts31          | 1.1   | 5.9   | 4.0   | 3.4   | 3.2                 |
| p31           | -14.4 | -9.3  | -10.1 | -11.2 | -12.1               |
| ts34          | 33.0  | 32.5  | 32.7  | 33.0  | 32.7                |
| p34           | 28.7  | 28.0  | 29.5  | 29.8  | 29.4                |
| ts35          | 15.2  | 17.4  | 17.2  | 17.1  | 17.2                |
| p35           | 13.5  | 18.8  | 18.4  | 18.1  | 18.5                |
| mean AE       | 2.5   | 1.9   | 0.5   | 0.5   |                     |
| SD            | 2.6   | 2.5   | 0.8   | 0.8   |                     |
| max AE        | 6.2   | 6.6   | 2.9   | 2.3   |                     |
| min AE        | 0.0   | 0.0   | 0.0   | 0.0   |                     |
| <b>MOR41</b>  | RT1   | RT2   | RT3   | RT4   | DLPNO-CCSD( $T_0$ ) |
| p7            | -12.0 | -13.0 | -16.1 | -14.1 | -14.5               |
| p9            | -7.0  | -6.2  | -14.2 | -14.1 | -9.8                |
| p14           | -63.2 | -46.8 | -54.1 | -54.4 | -52.1               |
| p16           | -46.5 | -44.3 | -37.4 | -38.9 | -42.7               |
| p21           | -19.6 | -17.5 | -10.6 | -10.5 | -14.9               |
| p22           | -69.6 | -52.0 | -11.6 | -38.4 | -42.5               |
| p36           | -51.5 | -50.7 | -43.5 | -42.3 | -40.5               |
| mean AE       | 9.0   | 4.9   | 7.4   | 3.0   |                     |
| SD            | 10.3  | 6.1   | 12.3  | 3.5   |                     |
| max AE        | 27.2  | 10.2  | 30.9  | 4.4   |                     |
| min AE        | 2.4   | 1.5   | 1.7   | 0.3   |                     |
| <b>WCCR10</b> | RT1   | RT2   | RT3   | RT4   | DLPNO-CCSD( $T_0$ ) |
| p1            | 18.4  | 33.2  | 28.5  | 29.7  | 30.1                |
| p2            | 78.1  | 68.4  | 65.5  | 71.3  | 71.7                |
| p3            | 66.6  | 70.1  | 65.2  | 65.5  | 72.0                |
| p4            | 50.9  | 41.7  | 48.2  | 51.5  | 53.4                |
| p5            | 50.1  | 50.4  | 51.6  | 51.7  | 53.2                |
| p6            | 71.9  | 66.9  | 65.1  | 65.5  | 67.5                |
| p7            | 65.4  | 65.4  | 64.6  | 64.6  | 59.1                |
| p8            | 50.9  | 47.8  | 47.4  | 47.4  | 49.1                |
| p9            | 31.7  | 36.1  | 39.3  | 40.0  | 42.1                |
| p10           | 19.9  | 21.0  | 24.7  | 24.2  | 25.0                |
| mean AE       | 5.7   | 4.1   | 3.4   | 2.3   |                     |
| SD            | 6.5   | 4.9   | 3.5   | 2.9   |                     |
| max AE        | 11.6  | 11.8  | 6.8   | 6.5   |                     |
| min AE        | 1.8   | 0.7   | 0.3   | 0.4   |                     |

Table S10 Reaction barriers (*tsn*) and reaction energies (*pn*) of all the systems computed at DLPNO-CCSD( $T_0$ )-in-B3LYP-D3 for four different DOS (RT1-RT4) region selections and full DLPNO-CCSD( $T_0$ )/def2-TZVP. Absolute errors (AE) (mean AE, max AE and min AE) and standard deviation (SD) are calculated based on DLPNO-CCSD( $T_0$ ).

| <b>MOBH35</b> | RT1   | RT2   | RT3   | RT4   | DLPNO-CCSD( $T_0$ ) |
|---------------|-------|-------|-------|-------|---------------------|
| ts1           | 29.8  | 30.5  | 27.3  | 27.4  | 27.5                |
| p1            | 5.4   | 9.2   | 8.1   | 10.8  | 12.6                |
| ts6           | 12.9  | 15.0  | 15.5  | 15.5  | 16.1                |
| p6            | -1.3  | 2.1   | 0.4   | 0.4   | 0.5                 |
| ts7           | 27.5  | 27.0  | 28.0  | 28.4  | 28.7                |
| p7            | 8.6   | 8.5   | 9.7   | 10.6  | 10.5                |
| ts11          | 30.5  | 37.1  | 35.7  | 35.9  | 36.3                |
| p11           | -72.0 | -58.4 | -54.1 | -53.9 | -55.5               |
| ts14          | 2.1   | 11.3  | 10.8  | 10.3  | 10.2                |
| p14           | -14.4 | -6.4  | -3.0  | -3.6  | -4.4                |
| ts21          | 16.8  | 10.6  | 10.3  | 10.1  | 8.3                 |
| p21           | 0.0   | 0.0   | 0.0   | 0.0   | 0.0                 |
| ts22          | 17.6  | 17.8  | 16.7  | 16.3  | 15.6                |
| p22           | -9.4  | -9.6  | -12.5 | -12.3 | -12.3               |
| ts24          | 3.3   | 3.8   | 3.7   | 3.3   | 2.8                 |
| p24           | -11.0 | -12.9 | -15.3 | -16.0 | -13.8               |
| ts29          | 13.9  | 11.9  | 13.1  | 14.1  | 14.7                |
| p29           | -18.2 | -19.5 | -15.2 | -14.3 | -16.2               |
| ts30          | 10.5  | 10.6  | 11.1  | 10.7  | 11.4                |
| p30           | -6.8  | -6.9  | -5.9  | -6.2  | -6.0                |
| ts31          | 4.8   | 6.3   | 3.7   | 3.3   | 3.2                 |
| p31           | -10.9 | -10.7 | -9.9  | -10.7 | -12.1               |
| ts34          | 31.7  | 31.6  | 32.5  | 33.2  | 32.7                |
| p34           | 27.4  | 27.1  | 28.6  | 29.9  | 29.4                |
| ts35          | 15.1  | 15.4  | 16.8  | 16.8  | 17.2                |
| p35           | 18.1  | 19.9  | 18.0  | 18.0  | 18.5                |
| mean AE       | 3.4   | 1.8   | 0.9   | 0.7   |                     |
| SD            | 4.8   | 2.1   | 1.3   | 1.0   |                     |
| max AE        | 16.6  | 3.4   | 4.6   | 2.2   |                     |
| min AE        | 0.0   | 0.0   | 0.0   | 0.0   |                     |
| <b>MOR41</b>  | RT1   | RT2   | RT3   | RT4   | DLPNO-CCSD( $T_0$ ) |
| p7            | -5.6  | -10.5 | -15.1 | -13.6 | -14.5               |
| p9            | -22.9 | -18.2 | -22.2 | -20.1 | -9.8                |
| p14           | -57.0 | -64.0 | -57.6 | -56.5 | -52.1               |
| p16           | -41.6 | -37.2 | -34.0 | -33.7 | -42.7               |
| p21           | -33.0 | -11.5 | -12.8 | -12.7 | -14.9               |
| p22           | -41.1 | -40.4 | -38.9 | -40.7 | -42.5               |
| p36           | -67.6 | -59.3 | -47.8 | -41.5 | -40.5               |
| mean AE       | 10.6  | 7.7   | 5.7   | 4.2   |                     |
| SD            | 12.6  | 9.5   | 7.2   | 6.0   |                     |
| max AE        | 27.1  | 18.8  | 12.3  | 10.3  |                     |
| min AE        | 1.1   | 2.0   | 0.6   | 0.9   |                     |
| <b>WCCR10</b> | RT1   | RT2   | RT3   | RT4   | DLPNO-CCSD( $T_0$ ) |
| p1            | 22.2  | 24.3  | 28.8  | 30.0  | 30.1                |
| p2            | 76.2  | 60.5  | 60.1  | 59.3  | 71.7                |
| p3            | 78.6  | 70.4  | 65.0  | 63.0  | 72.0                |
| p4            | 47.4  | 54.4  | 50.9  | 52.1  | 53.4                |
| p5            | 40.5  | 45.3  | 49.0  | 50.2  | 53.2                |
| p6            | 65.5  | 65.1  | 64.9  | 64.7  | 67.5                |
| p7            | 76.5  | 62.7  | 60.9  | 61.0  | 59.1                |
| p8            | 52.9  | 47.6  | 47.0  | 47.0  | 49.1                |
| p9            | 29.4  | 34.5  | 35.6  | 38.8  | 42.1                |
| p10           | 17.0  | 21.5  | 25.1  | 25.0  | 25.0                |
| mean AE       | 8.2   | 4.6   | 4.0   | 3.6   |                     |
| SD            | 9.7   | 4.5   | 3.9   | 4.3   |                     |
| max AE        | 17.4  | 11.2  | 11.6  | 12.4  |                     |
| min AE        | 2.0   | 0.9   | 0.1   | 0.0   |                     |

Table S11 Reaction barriers ( $ts_n$ ) and reaction energies ( $pn$ ) of all the systems computed at DLPNO-CCSD( $T_0$ )-in-DSDBLYP-D3 for four different DOS (RT1-RT4) region selections and full DLPNO-CCSD( $T_0$ )/def2-TZVP. Absolute errors (AE) (mean AE, max AE and min AE) and standard deviation (SD) are calculated based on DLPNO-CCSD( $T_0$ ).

| <b>MOBH35</b> | RT1   | RT2   | RT3   | RT4   | DLPNO-CCSD( $T_0$ ) |
|---------------|-------|-------|-------|-------|---------------------|
| ts1           | 31.6  | 28.4  | 27.2  | 27.4  | 27.5                |
| p1            | 11.3  | 10.2  | 11.0  | 11.6  | 12.6                |
| ts6           | 15.6  | 17.4  | 15.3  | 15.6  | 16.1                |
| p6            | 0.3   | 2.3   | 0.2   | 0.2   | 0.5                 |
| ts7           | 29.6  | 28.1  | 28.7  | 28.8  | 28.7                |
| p7            | 12.1  | 10.0  | 11.0  | 10.9  | 10.5                |
| ts11          | 32.1  | 36.2  | 35.8  | 36.0  | 36.3                |
| p11           | -62.8 | -56.6 | -55.1 | -55.0 | -55.5               |
| ts14          | 7.8   | 10.5  | 10.5  | 10.4  | 10.2                |
| p14           | -8.3  | -4.9  | -3.8  | -4.2  | -4.4                |
| ts21          | 10.7  | 9.3   | 9.1   | 9.1   | 8.3                 |
| p21           | 0.0   | 0.0   | 0.0   | 0.0   | 0.0                 |
| ts22          | 17.3  | 16.9  | 16.4  | 16.0  | 15.6                |
| p22           | -11.0 | -11.2 | -12.0 | -12.4 | -12.3               |
| ts24          | 3.6   | 3.5   | 3.3   | 2.9   | 2.8                 |
| p24           | -12.5 | -13.2 | -12.2 | -13.4 | -13.8               |
| ts29          | 14.2  | 13.7  | 13.7  | 14.3  | 14.7                |
| p29           | -16.3 | -18.1 | -16.9 | -15.7 | -16.2               |
| ts30          | 10.6  | 10.7  | 10.9  | 10.8  | 11.4                |
| p30           | -7.5  | -7.3  | -6.7  | -6.8  | -6.0                |
| ts31          | 3.6   | 4.1   | 3.5   | 3.3   | 3.2                 |
| p31           | -11.4 | -9.9  | -10.4 | -10.7 | -12.1               |
| ts34          | 32.6  | 31.8  | 32.4  | 32.8  | 32.7                |
| p34           | 29.1  | 28.1  | 28.9  | 29.6  | 29.4                |
| ts35          | 15.3  | 16.8  | 17.2  | 17.2  | 17.2                |
| p35           | 17.8  | 19.8  | 18.5  | 18.4  | 18.5                |
| mean AE       | 1.6   | 1.0   | 0.6   | 0.4   |                     |
| SD            | 2.3   | 1.2   | 0.7   | 0.5   |                     |
| max AE        | 7.3   | 2.4   | 1.7   | 1.4   |                     |
| min AE        | 0.0   | 0.0   | 0.0   | 0.0   |                     |
| <b>MOR41</b>  | RT1   | RT2   | RT3   | RT4   | DLPNO-CCSD( $T_0$ ) |
| p7            | -11.1 | -13.3 | -13.9 | -14.3 | -14.5               |
| p9            | -16.9 | -16.8 | -17.1 | -15.5 | -9.8                |
| p14           | -65.8 | -46.5 | -56.5 | -50.8 | -52.1               |
| p16           | -38.8 | -34.1 | -36.4 | -38.0 | -42.7               |
| p21           | -13.1 | -12.5 | -13.5 | 3.9   | -14.9               |
| p22           | -13.4 | -46.8 | -38.7 | -39.4 | -42.5               |
| p36           | -52.6 | -50.0 | -40.8 | -40.8 | -40.5               |
| mean AE       | 10.2  | 5.5   | 3.5   | 4.8   |                     |
| SD            | 14.5  | 6.7   | 4.6   | 7.6   |                     |
| max AE        | 29.1  | 9.5   | 7.3   | 18.8  |                     |
| min AE        | 1.9   | 1.2   | 0.3   | 0.2   |                     |
| <b>WCCR10</b> | RT1   | RT2   | RT3   | RT4   | DLPNO-CCSD( $T_0$ ) |
| p1            | 28.0  | 28.5  | 28.4  | 28.0  | 30.1                |
| p2            | 68.0  | 65.3  | 66.9  | 66.4  | 71.7                |
| p3            | 77.9  | 68.4  | 66.3  | 66.5  | 72.0                |
| p4            | 56.5  | 54.5  | 52.3  | 53.7  | 53.4                |
| p5            | 41.6  | 48.2  | 51.2  | 52.1  | 53.2                |
| p6            | 66.0  | 66.0  | 65.4  | 65.6  | 67.5                |
| p7            | 63.9  | 63.6  | 63.6  | 63.4  | 59.1                |
| p8            | 48.8  | 47.8  | 47.7  | 47.9  | 49.1                |
| p9            | 37.3  | 41.6  | 39.5  | 41.8  | 42.1                |
| p10           | 20.4  | 21.9  | 24.5  | 24.9  | 25.0                |
| mean AE       | 4.2   | 2.9   | 2.7   | 2.2   |                     |
| SD            | 5.2   | 3.1   | 2.8   | 2.8   |                     |
| max AE        | 11.6  | 6.4   | 5.7   | 5.5   |                     |
| min AE        | 0.3   | 0.5   | 0.5   | 0.1   |                     |
